# Supplementary material
Source: publisher figshare collection journal article supplement (https://gsapubs.figshare.com/articles/dataset/_/12528422)

DR2012190 Pastor-Galán et al.

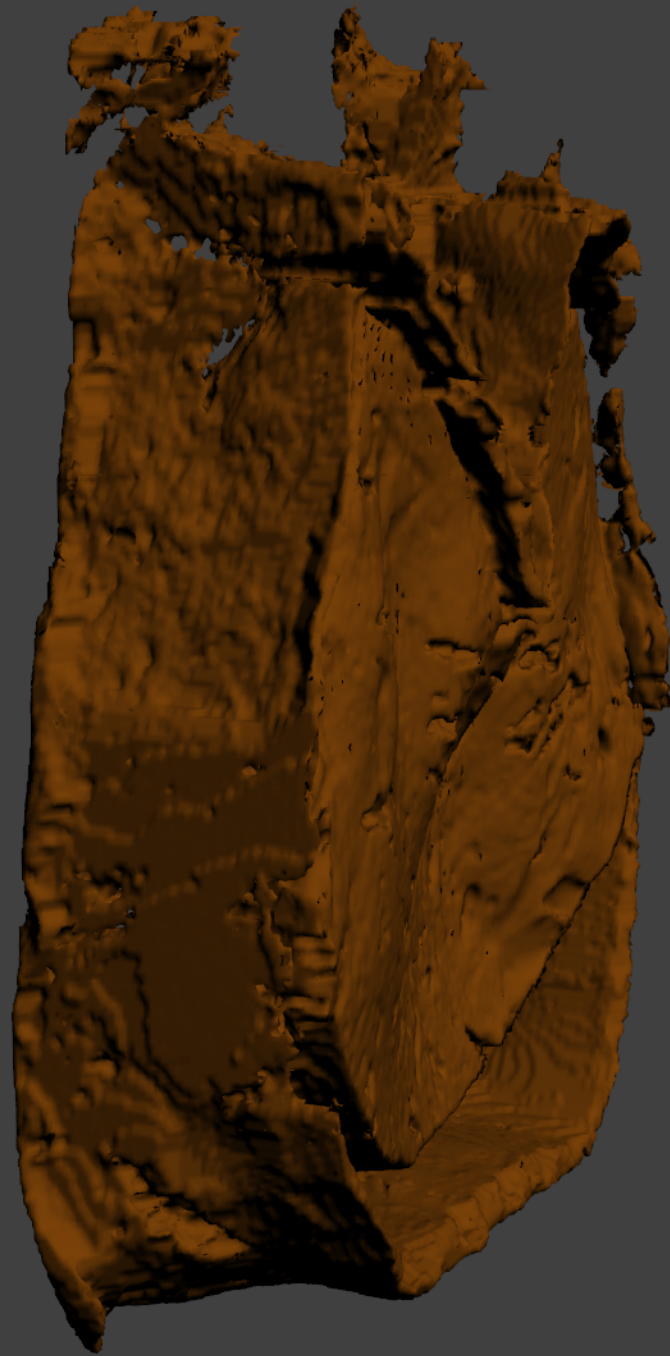



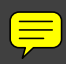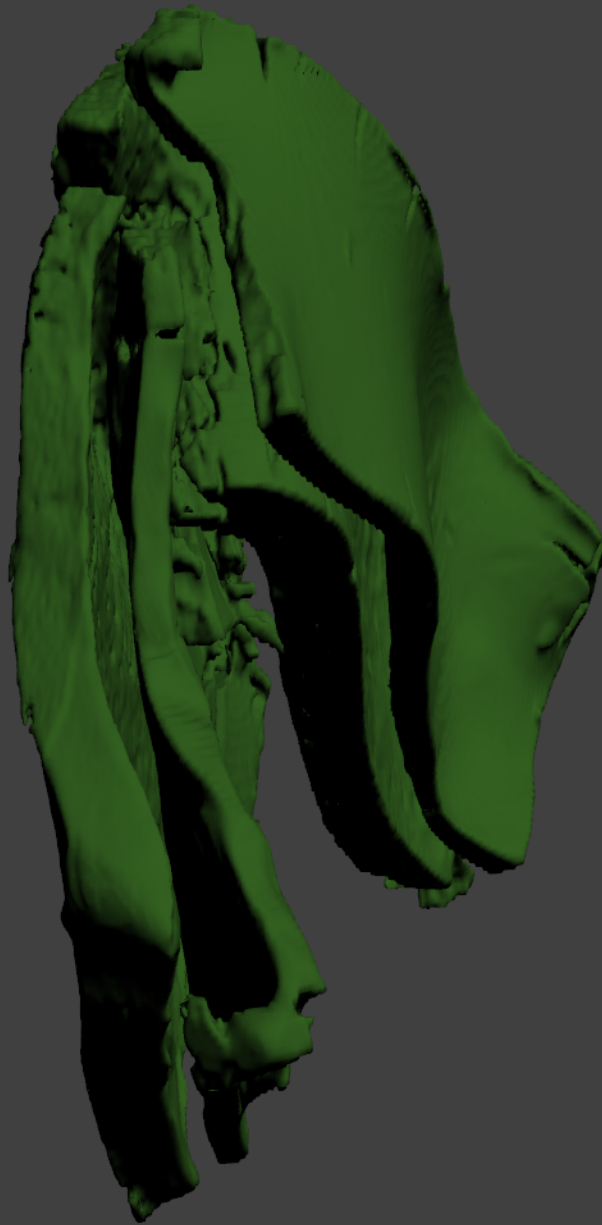

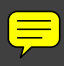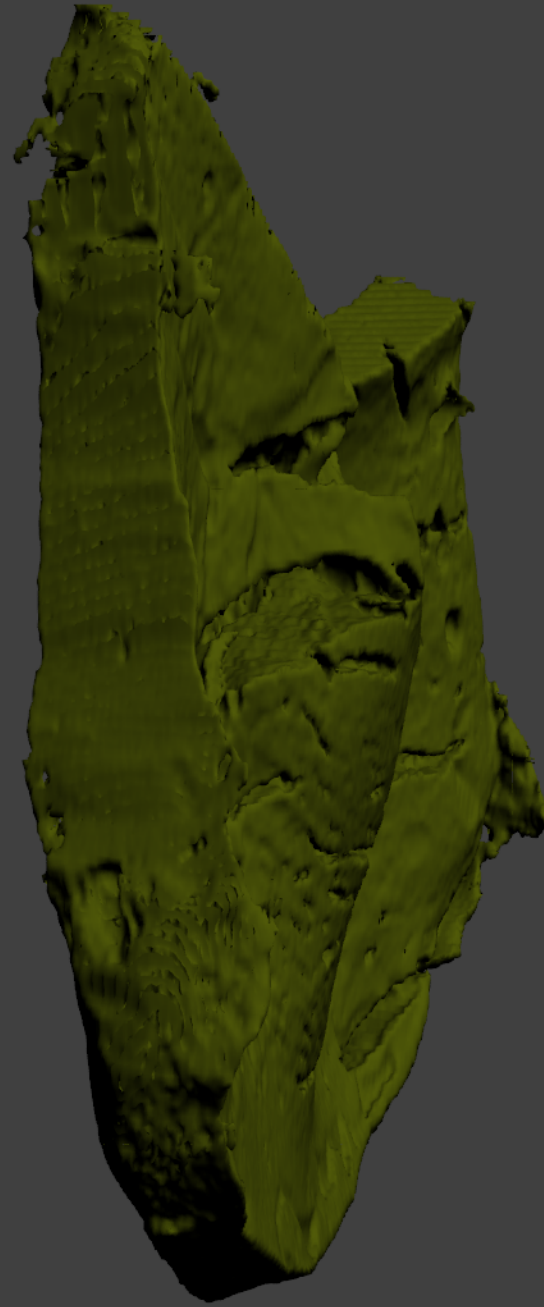

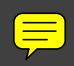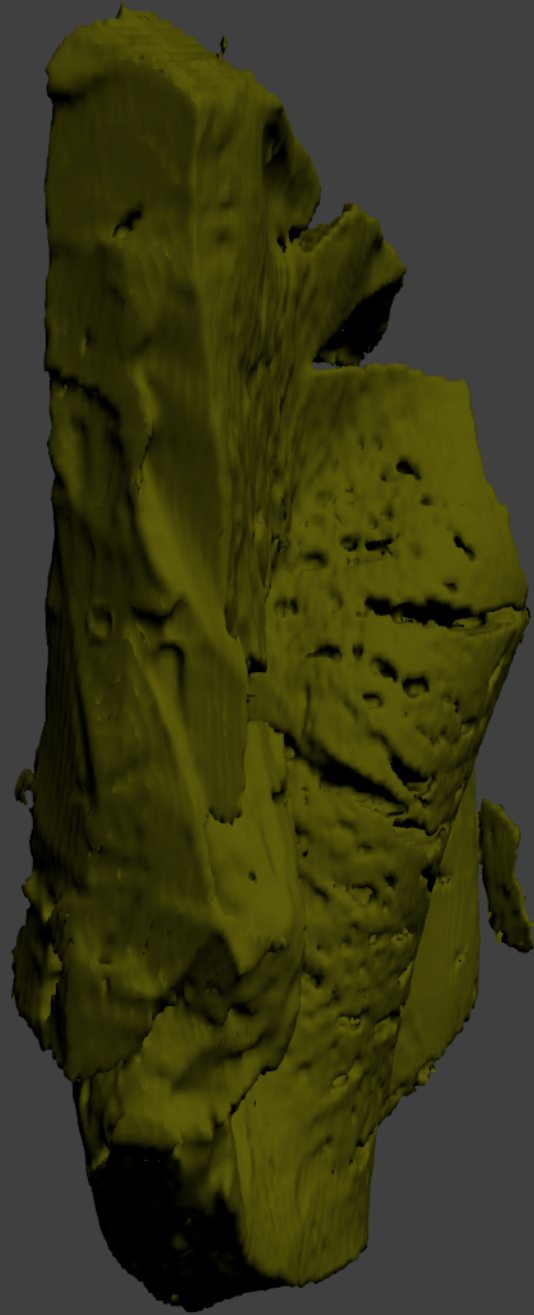

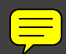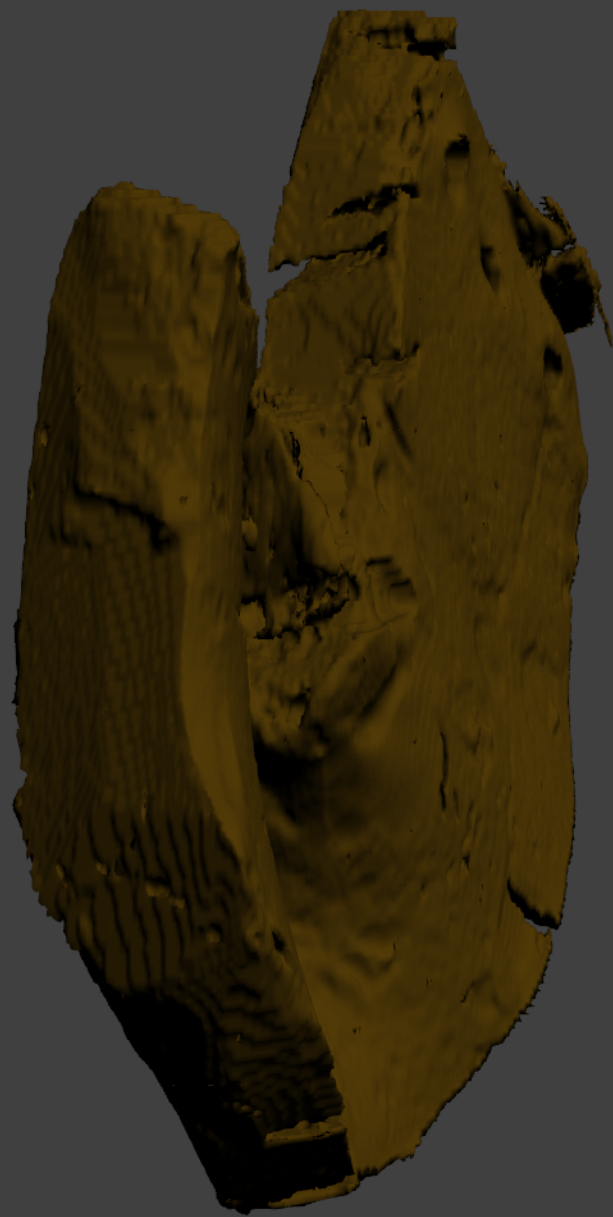

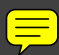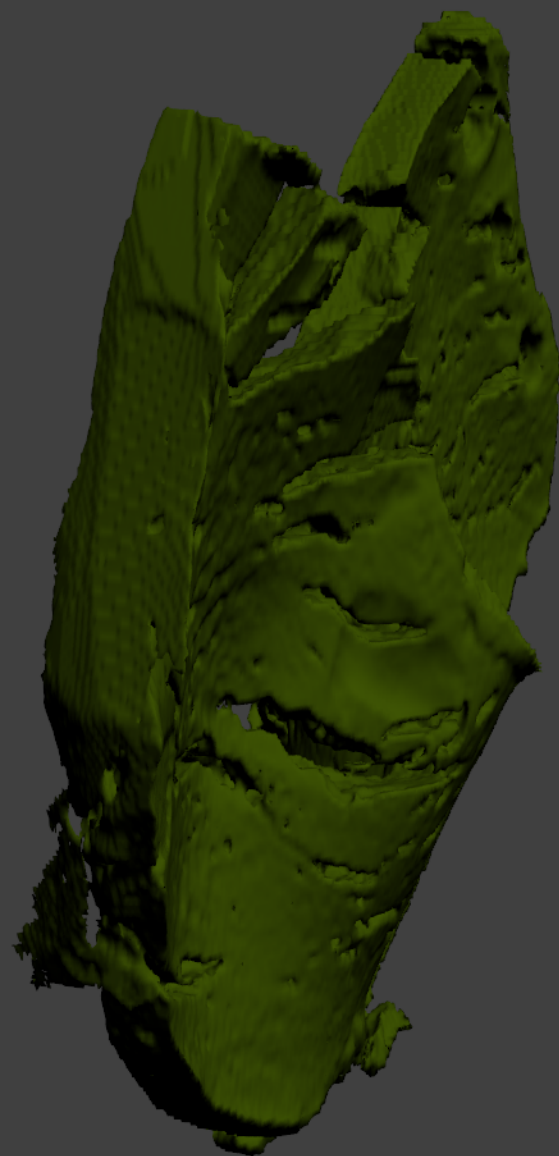

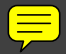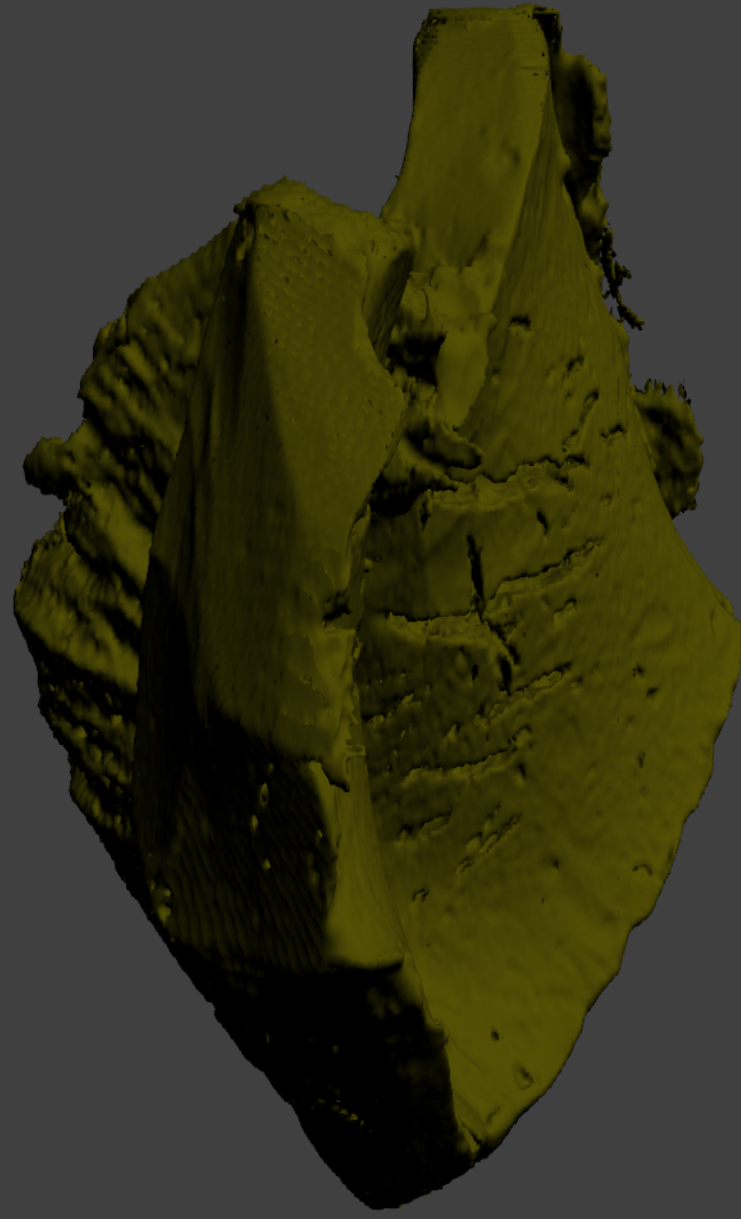

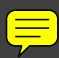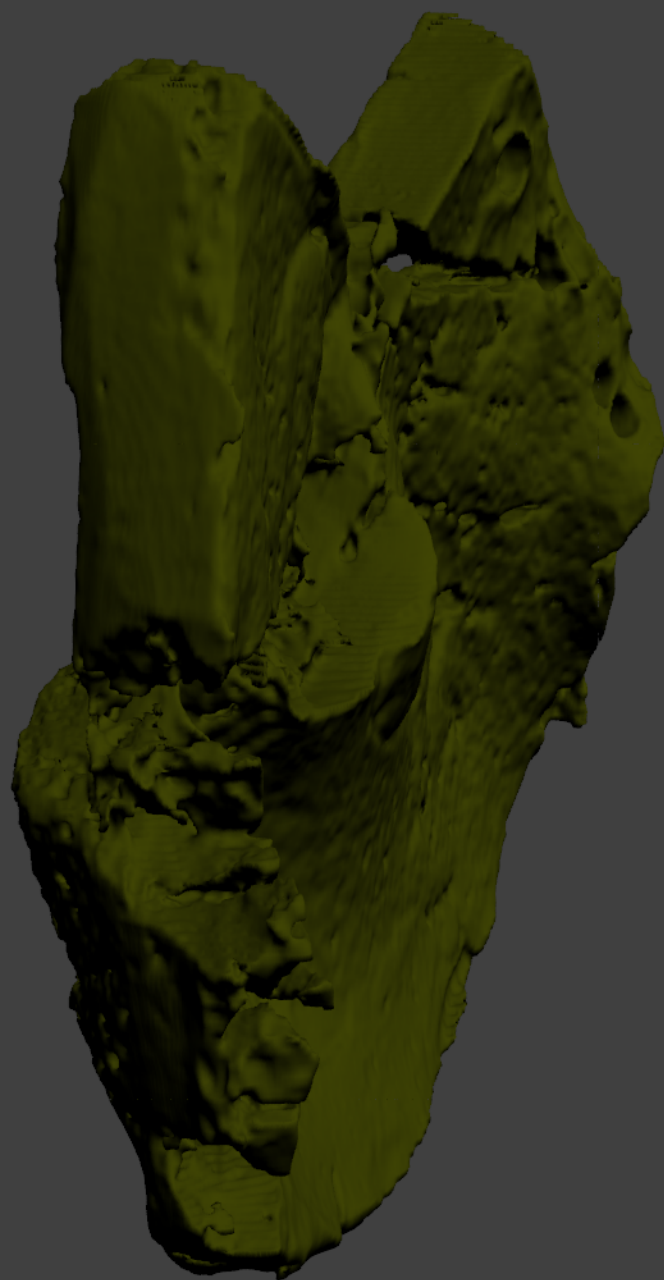

Video 1

Video 2

Supplement: Supplementary file 1 [file 1]
